# Supplementary material for: RNA-sequencing reveals early, dynamic transcriptome changes in the corollas of pollinated petunias
Source: PubMed Central journal article supplement (PMC4245787; doi:10.1186/s12870-014-0307-2), 2014-11-18
Supplement: 12870_2014_307_MOESM7_ESM.pdf [file 12870_2014_307_MOESM7_ESM.pdf]

**Additional file 7 Primers used for quantitative PCR.** Primers used to confirm expression patterns of select sequences from the RNA-seq analysis by quantitative PCR.

| <b>Primer Name</b>  | <b>Primer Sequence (5' – 3')</b> | <b>Corresponding Sequence ID</b> |
|---------------------|----------------------------------|----------------------------------|
| F <i>PhACTIN</i> RT | AGCCAACAGAGAGAAGATGACCCA         | CV299322                         |
| R <i>PhACTIN</i> RT | ACACCATCACCAGAGTCCAACACA         |                                  |
| F <i>PhATG6</i> RT  | GAGCGAGCAGCAATTTTAGC             | comp31514_c0_seq2                |
| R <i>PhATG6</i> RT  | CACTCGACCGGAATCTTAGG             |                                  |
| F <i>PhATG8a</i> RT | TGGCAGACAGCTGACTTTTC             | comp39985_c0_seq4                |
| R <i>PhATG8a</i> RT | TTTTAAACAACCATTTGAAGAGA          |                                  |
| F <i>PhATG8d</i> RT | TTGCATGCATCCTCACTCTT             | comp18014_c0_seq1                |
| R <i>PhATG8d</i> RT | TCAGTTAAAGGGTATAGACAAATCCA       |                                  |
| F <i>PhEBF1b</i> RT | CTCCGAAATTTGCAGGAGAGA            | comp40361_c0_seq2                |
| R <i>PhEBF1b</i> RT | AGCAGCAAGTCTAACATCAGTAG          |                                  |
| F <i>PhEIL1</i> RT  | GCAAGCTGCTGAGAAGCAGAACAA         | comp47181_c0_seq6                |
| R <i>PhEIL1</i> RT  | TCCGATGCACCACTCACAGGTTTA         |                                  |
